# Supplementary material for: A Case-by-Case Evolutionary Analysis of Four Imprinted Retrogenes
Source: PubMed Central journal article supplement (PMC3107425; doi:10.1111/j.1558-5646.2010.01213.x), 2011-05
Supplement: evo0065-1413-SD6.pdf [file evo0065-1413-SD6.pdf]

## Inpp5f\_v2-Vma21 family codon evolution results

| Model                     | omega used | lnL                              | P        | Estimates of parameters                                                                                                                                                                                                                                                                                                                                                 |
|---------------------------|------------|----------------------------------|----------|-------------------------------------------------------------------------------------------------------------------------------------------------------------------------------------------------------------------------------------------------------------------------------------------------------------------------------------------------------------------------|
| M0 : one ratio            | 0          | -2039.75                         | 1        | $\omega = 0.10$                                                                                                                                                                                                                                                                                                                                                         |
| <b>Site-specific:</b>     |            |                                  |          |                                                                                                                                                                                                                                                                                                                                                                         |
| M1:Neutral                | 0          | -2039.75                         | 2        | $p_0= 0.99, \omega_0=0.10$<br>$p_0= 1, p_1= 0$                                                                                                                                                                                                                                                                                                                          |
| M2:Selection              | 0          | -2039.75                         | 4        | $\omega_0=0.10, \omega_1= 1$                                                                                                                                                                                                                                                                                                                                            |
| <b>M3:Discrete(K = 2)</b> | <b>0</b>   | <b>-2024.97</b>                  | <b>3</b> | <b><math>p_0= 0.49, (p_1= 0.51)</math></b><br><b><math>\omega_0= 0.02, \omega_1= 0.19</math></b>                                                                                                                                                                                                                                                                        |
| M3:Discrete(K = 3)        | 0          | -2024.97                         | 5        | $p_0= 0.49, p_1= 0.51$<br>$\omega_0= 0.02, \omega_1=0.19$                                                                                                                                                                                                                                                                                                               |
| M7: Beta                  | 0          | -2025.79                         | 2        | $p= 0.95, q= 7.83$                                                                                                                                                                                                                                                                                                                                                      |
| M8: Beta&Omega > 1        | 0          | -2025.79                         | 4        | $p_0= 0.99, p = 0.95, q = 7.83$<br>$(p_1= 0.00001), \omega = 1$                                                                                                                                                                                                                                                                                                         |
| M8a: Beta&Omega = 1       | 1          | -2025.79                         | 3        | $p_0= 0.99, p = 0.95, q = 7.83$<br>$(p_1= ?), \omega = 1$                                                                                                                                                                                                                                                                                                               |
| <b>Branch-specific</b>    |            |                                  |          |                                                                                                                                                                                                                                                                                                                                                                         |
| Model A                   | 0          | -2029.53                         | 4        | $p_0 = 0.40, p_1 = 0,$<br>$(p_2 = 0.60, p_3 = 0), \omega_0 = 0.09,$<br>$\omega_1 = 1, \omega_2 = 1$                                                                                                                                                                                                                                                                     |
| Model A null              | 1          | -2029.53                         | 3        | $p_0 = 0.40, p_1 = 0,$<br>$(p_2 = 0.60, p_3 = 0), \omega_0 = 0.09,$<br>$\omega_1 = 1, \omega_2 = 1$                                                                                                                                                                                                                                                                     |
| <b>Model B</b>            | <b>0</b>   | <b>-2020.32</b>                  | <b>5</b> | <b><math>p_0 = 0.23, p_1 = 0.22, p_2 = 0.28,</math></b><br><b><math>p_3 = 0.27</math></b><br><b>Foreground:</b><br><b><math>\omega_0 = 0.01, \omega_1 = 0.19, \omega_2 =</math></b><br><b><math>0.80, \omega_3 = 0.80</math></b><br><b>Background:</b><br><b><math>\omega_0 = 0.01, \omega_1 = 0.19, \omega_2 =</math></b><br><b><math>0.01, \omega_3 = 0.19</math></b> |
| <b>Comparison</b>         | <b>df</b>  | <b><math>\Delta l</math></b>     |          | <b>Critical <math>\chi^2</math> values</b>                                                                                                                                                                                                                                                                                                                              |
| <b>M0 v M3k2</b>          | <b>2</b>   | <b>2(2039.75-2024.97)=29.56*</b> |          | <b><math>\geq 5.99</math></b>                                                                                                                                                                                                                                                                                                                                           |
| M3k2 v M3k3               | -          | 1(2024.97-2024.97)=0             |          | $\geq 1.00$                                                                                                                                                                                                                                                                                                                                                             |
| M1 v M2                   | 2          | 2(2039.75-2039.75)=0             |          | $\geq 5.99$                                                                                                                                                                                                                                                                                                                                                             |
| M7 v M8                   | 2          | 2(2025.79-2025.79)=0             |          | $\geq 5.99$                                                                                                                                                                                                                                                                                                                                                             |
| M8 v M8a                  | 1          | 2(2025.79-2025.79)=0             |          | $\geq 2.71$ (@5%)<br>$\geq 5.41$ (@1%)                                                                                                                                                                                                                                                                                                                                  |
| M1 v Model A              | 2          | 2(2039.75-2029.53)=20.44*        |          | $\geq 5.99$                                                                                                                                                                                                                                                                                                                                                             |
| Model A v Model A null    | 1          | 2(2029.53-2029.53)=0             |          | $\geq 3.84$ (@5%)                                                                                                                                                                                                                                                                                                                                                       |
| <b>M3k2 v Model B</b>     | <b>2</b>   | <b>2(2024.97-2020.32)=9.3*</b>   |          | <b><math>\geq 5.99</math></b>                                                                                                                                                                                                                                                                                                                                           |

## Mcts family codon evolution results

| Model                     | omega used | lnL                       | P                                      | Estimates of parameters                                                                                     |
|---------------------------|------------|---------------------------|----------------------------------------|-------------------------------------------------------------------------------------------------------------|
| M0 : one ratio            | 0          | -2554.31                  | 1                                      | $\omega = 0.04$                                                                                             |
| <b>Site-specific</b>      |            |                           |                                        |                                                                                                             |
| M1:Neutral                | 0          | -2539.00                  | 2                                      | $p_0 = 0.96, \omega_0 < 0.03$                                                                               |
| M2:Selection              | 0          | -2539.00                  | 4                                      | $p_0 = 0.96, p_1 = 0.04$<br>$\omega_0 = 0.03, \omega_1 = 1$                                                 |
| <b>M3:Discrete(K = 2)</b> | <b>0</b>   | <b>-2528.13</b>           | <b>3</b>                               | <b><math>p_0 = 0.89, (p_1 = 0.11)</math></b><br><b><math>\omega_0 = 0.01, \omega_1 = 0.27</math></b>        |
| M3:Discrete(K = 3)        | 0          | -2527.49                  | 5                                      | $p_0 = 0.52, p_1 = 0.41, (p_2 = 0.07)$<br>$\omega_0 = 0, \omega_1 = 0.05, \omega_2 = 0.34$                  |
| M7: Beta                  | 0          | -2528.36                  | 2                                      | $p = 0.19, q = 3.65$                                                                                        |
| M8: Beta&Omega > 1        | 0          | -2525.36                  | 4                                      | $p_0 = 0.10, p = 0.185, q = 3.66$<br>$(p_1 = 0.00001), \omega = 1.00$                                       |
| M8a: Beta&Omega = 1       | 1          | -2528.36                  | 3                                      | $p_0 = 0.99, p = 0.19, q = 3.66$<br>$(p_1 = 0.00001), \omega = 1$                                           |
| <b>Branch-specific</b>    |            |                           |                                        | Values for Foreground                                                                                       |
| Model A                   | 0          | -2536.79                  | 4                                      | $p_0 = 0.003, p_1 = 0.00001,$<br>$(p_2 = 0.96, p_3 = 0.04), \omega_0 = 0.02, \omega_1 = 1, \omega_2 = 1.00$ |
| Model A null              | 1          | -2536.79                  | 3                                      | $p_0 = 0.0006, p_1 = 0.00003,$<br>$(p_2 = 0.96, p_3 = 0.04), \omega_0 = 0.02, \omega_1 = 1, \omega_2 = 1$   |
| Model B                   | 0          | -2525.16                  | 5                                      | $p_0 = 0.00, p_1 = 0.00, (p_2 = 0.88, p_3 = 0.11),$<br>$\omega_0 = 0.1, \omega_1 = 0.26, \omega_2 = 2.73$   |
| <hr/>                     |            |                           |                                        |                                                                                                             |
| Comparison                | df         | $\Delta l$                | Critical $\chi^2$ values               |                                                                                                             |
| M0 v M3k2                 | 2          | 2(2554.31-2528.13)=52.36* | $\geq 5.99$                            |                                                                                                             |
| M3k2 v M3k3               | -          | 1(2528.13-2527.49)=0.64   | $\geq 1.00$                            |                                                                                                             |
| M1 v M2                   | 2          | 2(2539.00-2539.00)=0      | $\geq 5.99$                            |                                                                                                             |
| M7 v M8                   | 2          | 2(2528.36-2525.36)=0      | $\geq 5.99$                            |                                                                                                             |
| M8 v M8a                  | 1          | 2(2528.36-2525.36)=0      | $\geq 2.71$ (@5%)<br>$\geq 5.41$ (@1%) |                                                                                                             |
| M1 v Model A              | 2          | 2(2539.00-2536.79)=4.42   | $\geq 5.99$                            |                                                                                                             |
| Model A v Model A null    | 1          | 2(2536.79-2539.79)=0      | $\geq 3.84$ (@5%)                      |                                                                                                             |
| M3k2 v Model B            | 2          | 2(2528.13-2525.16)=5.94   | $\geq 5.99$                            |                                                                                                             |

## Nap11 family codon evolution results

| Model                     | omega used | lnL                                 | P                                      | Estimates of parameters                                                                                |
|---------------------------|------------|-------------------------------------|----------------------------------------|--------------------------------------------------------------------------------------------------------|
| M0 : one ratio            | 0          | -<br>12832.55                       | 1                                      | $\omega = 0.19$                                                                                        |
| <b>Site-specific:</b>     |            |                                     |                                        |                                                                                                        |
| M1:Neutral                | 0          | -<br>12733.70                       | 2                                      | $p_0 = 0.75, p_1 = 0.25$<br>$\omega_0 = 0.13, \omega_1 = 1$                                            |
| M2:Selection              | 0          | -<br>12733.70                       | 4                                      | $p_0 = 0.75, p_1 = 0.26$<br>$\omega_0 = 0.14, \omega_1 = 1$                                            |
| <b>M3:Discrete(K = 2)</b> | <b>0</b>   | -<br><b>12667.28</b>                | <b>3</b>                               | <b><math>p_0 = 0.50, p_1 = 0.50</math></b><br><b><math>\omega_0 = 0.06, \omega_1 = 0.38</math></b>     |
| M3:Discrete(K = 3)        | 0          | -<br>12667.28                       | 5                                      | $p_0 = 0.50, p_1 = 0.50$<br>$\omega_0 = 0.06, \omega_1 = 0.38$                                         |
| M7: Beta                  | 0          | -<br>12663.91                       | 2                                      | $p = 0.94, q = 3.27$                                                                                   |
| M8: Beta&Omega > 1        | 0          | -<br>12663.91                       | 4                                      | $p_0 = 0.99, p = 0.94, q = 3.27$<br>$(p_1 = 0.01), \omega = 1$                                         |
| M8a: Beta&Omega = 1       | 1          | -<br>12663.91                       | 3                                      | $p_0 = 0.99, p = 0.94, q = 3.27$<br>$(p_1 = 0.01), \omega = 1$                                         |
| <b>Branch-specific</b>    |            |                                     |                                        |                                                                                                        |
| Model A                   | 0          | -<br>12727.76                       | 4                                      | $p_0 = 0.47, p_1 = 0.15,$<br>$p_2 = 0.38, \omega_0 = 0.13, \omega_1 = 1,$<br>$\omega_2 = 2.22$         |
| Model A null              | 1          | -<br>12728.61                       | 3                                      | $p_0 = 0.45, p_1 = 0.15,$<br>$p_2 = 0.31, \omega_0 = 0.13, \omega_1 = 1,$<br>$\omega_2 = 1$            |
| Model B                   | 0          | -<br>12664.50                       | 5                                      | $p_0 = 0.33, p_1 = 0.33, p_2 =$<br>$0.34,$<br>$\omega_0 = 0.06, \omega_1 = 0.37, \omega_2 =$<br>$1.07$ |
| <b>Comparison</b>         |            |                                     |                                        |                                                                                                        |
| Comparison                | df         | $\Delta l$                          | Critical $\chi^2$ values               |                                                                                                        |
| M0 v M3k2                 | 2          | <b>2(12832.55-12667.28)=330.54*</b> | <b><math>\geq 5.99</math></b>          |                                                                                                        |
| M3k2 v M3k3               | -          | 1(12667.28-12667.28)=0              | $\geq 1.00$                            |                                                                                                        |
| M1 v M2                   | 2          | 2(12733.70-12633.70)=0              | $\geq 5.99$                            |                                                                                                        |
| M7 v M8                   | 2          | 2(12663.91-12663.91)=0              | $\geq 5.99$                            |                                                                                                        |
| M8 v M8a                  | 1          | 2(12663.91-12993.91)=0              | $\geq 2.71$ (@5%)<br>$\geq 5.41$ (@1%) |                                                                                                        |
| M1 v Model A              | 2          | 2(12733.70-12727.76)=11.88*         | $\geq 5.99$                            |                                                                                                        |
| Model A v Model A null    | 1          | 2(12727.76-12728.61)=-1.7           | $\geq 3.84$ (@5%)                      |                                                                                                        |
| M3k2 v Model B            | 2          | 2(12667.28-12664.50)=5.56           | $\geq 5.99$                            |                                                                                                        |

## U2af1-rs family codon evolution results

| Model                     | omega used | lnL             | P        | Estimates of parameters                                                                                                                                                                                                                                                                                                                                                 |
|---------------------------|------------|-----------------|----------|-------------------------------------------------------------------------------------------------------------------------------------------------------------------------------------------------------------------------------------------------------------------------------------------------------------------------------------------------------------------------|
| M0 : one ratio            | 0          | -7449.37        | 1        | $\omega = 0.14$                                                                                                                                                                                                                                                                                                                                                         |
| <b>Site-specific:</b>     |            |                 |          |                                                                                                                                                                                                                                                                                                                                                                         |
| M1:Neutral                | 0          | -7302.37        | 2        | $p_0 = 0.83, \omega_0 < 1$                                                                                                                                                                                                                                                                                                                                              |
| M2:Selection              | 0          | -7302.37        | 4        | $p_0 = 0.83, p_1 = 0.16$<br>( $p_2 = 0.008$ ), $\omega_0 < 0.074, \omega_1 = 1, \omega_2 = 38.93$                                                                                                                                                                                                                                                                       |
| M3:Discrete(K = 2)        | 0          | -7302.16        | 3        | $p_0 = 0.80, (p_1 = 0.20)$<br>$\omega_0 = 0.06, \omega_1 = 0.78$                                                                                                                                                                                                                                                                                                        |
| <b>M3:Discrete(K = 3)</b> | <b>2</b>   | <b>-7293.06</b> | <b>5</b> | <b><math>p_0 = 0.58, p_1 = 0.31, (p_2 = 0.10)</math></b><br><b><math>\omega_0 = 0.033, \omega_1 = 0.24, \omega_2 = 1.30</math></b>                                                                                                                                                                                                                                      |
| M7: Beta                  | 0          | -7307.48        | 2        | $p = 0.32, q = 1.32$                                                                                                                                                                                                                                                                                                                                                    |
| M8: Beta&Omega > 1        | 0          | -7293.27        | 4        | $p_0 = 0.90, p = 0.68, q = 5.46$<br>( $p_1 = 0.100$ ), $\omega = 1.31$                                                                                                                                                                                                                                                                                                  |
| M8a: Beta&Omega = 1       | 1          | -7294.55        | 3        | $p_0 = 0.87, p = 0.80, q = 7.49$<br>( $p_1 = 0.13$ ), $\omega = 1$                                                                                                                                                                                                                                                                                                      |
| <b>Branch-specific</b>    |            |                 |          |                                                                                                                                                                                                                                                                                                                                                                         |
| Model A                   | 0          | -7286.39        | 4        | $p_0 = 0.77, p_1 = 0.16,$<br>( $p_2 = 0.06, p_3 = 0.01$ ), $\omega_0 = 0.06,$<br>$\omega_1 = 1, \omega_2 = 3.91, \omega_3 = 3.91$                                                                                                                                                                                                                                       |
| Model A null              | 1          | -7289.73        | 3        | $p_0 = 0.72, p_1 = 0.14,$<br>( $p_2 = 0.11, p_3 = 0.02$ ), $\omega_0 = 0.06,$<br>$\omega_1 = 1, \omega_2 = 1$                                                                                                                                                                                                                                                           |
| <b>Model B</b>            | <b>0</b>   | <b>-7284.63</b> | <b>5</b> | <b><math>p_0 = 0.74, p_1 = 0.18, p_2 = 0.06,</math></b><br><b><math>p_3 = 0.01</math></b><br><b>Foreground:</b><br><b><math>\omega_0 = 0.06, \omega_1 = 0.79, \omega_2 = 3.74,</math></b><br><b><math>\omega_3 = 3.74</math></b><br><b>Background:</b><br><b><math>\omega_0 = 0.06, \omega_1 = 0.79, \omega_2 = 0.06,</math></b><br><b><math>\omega_3 = 0.78</math></b> |

| Comparison             | df       | $\Delta l$                        | Critical $\chi^2$ values               |
|------------------------|----------|-----------------------------------|----------------------------------------|
| M0 v M3k2              | 2        | 2(7449.37-7302.16)=294.42*        | $\geq 5.99$                            |
| M3k2 v M3k3            | -        | 1(7302.16-7293.06)=9.1*           | $\geq 1.00$                            |
| M1 v M2                | 2        | 2(7304.01-7302.37)=3.28           | $\geq 5.99$                            |
| M7 v M8                | 2        | 2(7307.48-7293.27)=29.06*         | $\geq 5.99$                            |
| M8 v M8a               | 1        | 2(7293.27-7294.35)=2.56           | $\geq 2.71$ (@5%)<br>$\geq 5.41$ (@1%) |
| M1 v Model A           | 2        | 2(7304.01-7286.39)=35.42*         | $\geq 5.99$                            |
| Model A v Model A null | 1        | 2(7289.73-7286.39)=6.68*          | $\geq 3.84$ (@5%)                      |
| <b>M3k2 v Model B</b>  | <b>2</b> | <b>2(7302.16-7284.63)=107.06*</b> | <b><math>\geq 5.99</math></b>          |
