# Supplementary material for: A Case-by-Case Evolutionary Analysis of Four Imprinted Retrogenes
Source: PubMed Central journal article supplement (PMC3107425; doi:10.1111/j.1558-5646.2010.01213.x), 2011-05
Supplement: evo0065-1413-SD8.pdf [file evo0065-1413-SD8.pdf]

Printed: Wednesday, September 16, 2009 11:43:03

---

---

>HumanIn  
MPRSHRPPPTAQRAAEPKSEGVVAMTFKIFLLFAGLMVKVPVGLYFSCKLLLFQSLMLMSPEDSGFYATIVAVVGLHVVLAIFFVIVWKEGLP

>MouseIn  
MPRSHRQPPAPRAPEPKSDGVLAMTFKIFLLFAGLMVKVPVGLYFSCKLLLFQSLMLMSPEDSAFYATIVSVVGLHVVLAIFFVIVWKEGLP

>RatIn  
MPCSHRQPPVPRAPEPKSDGVLAMTFKIFLLFAGLMVKVPVGLYFSCKLLLFQSLMLMSPEDSAFYATIVSVVGLHVVLATFFVIVWEEGLP

>DogIn  
MPRSHRPPPTAQRPAAEPKPEGLATTFKIFLLFAGLMVKVPVGLYFSCKLLLFQSLMLMSPDDSGFYATIVAVVGLHVVLAVFFVIVWKEGMP

>CowIn  
MPRSHRPPPTAQRQAEPKPEGLATTFKIFLLFAGLMVKVPVGLYFSCKLLLFQSLMLMSPDDSGFYATIVAVVGLHVVLAVFFVIVWKEGMP

>ElephIn  
MPRSHRHPPAAPRTEEPKSDGVLPMTFKIFLLFAGLMVKVPVGLYFSCKLLLFQSLMLMSPEDSAFYATIVAVVGLHVELAFFFIIVWKEGLP

>ArmIn  
MPRSHRPPPVAQRPAEPKSDGVLAMTFKIFLLFAGLMVKVPVGLYFSCKLLLFQSLMLMSPEDSAFYATIVAVVGLHVVLAIFFVIVWKEGLL

>HumanTmem  
MERPDKAALNALQPPEFRNESSLASTLKTLLFFTALMITVPIGLYFTTKSYIFEGALGMSNRDSYFYAAIVAVVAVHVVLALFVYVAVWNEGSR

>MouseTmem  
MERLDKAALNALQPPEFRNENSLAATLKTLLFFTALMITVPIGLYFTTKAYIFEGALGMSNRDSYFYAAIVAVVAVHVVLALFVYVAVWNEGSR

>CowTmem  
MERLDKAALNALQPSDFRNESSLASTLKTLLFFTALMITVPIGLYFTTKSYVFEFAGFGMSNRDSYFYAAIVAVVAVHVVLALFVYVAVWNEGSR

>DogTmem  
MERLDKAALNALQPPDFRNESSLASTLKTLLFFTALMITVPIGLYFTTKSYVFEFAGFGMSNRDSYFYAAIVAVVAHVVLALFVYVAVWNEGSR

>ElephTmem  
MERLDKAALNALQPPDFRSESSLASTLKTLLFFTALMITVPIGLYFTTKSYVFEFAGFGMSNRDSYFYAAIVAVVAVHVVLALFLYVAVWNEGSR

>ArmTmem  
MERFDKAALNALQPPEFRTESSLASTLKTLLFFTALMITVPIGLYFTTKSYLFEFAGFGMSNRDSYFYAAIVAVVAVHVVLALFVYVAVWNEGSR

>OpMTmem  
MERLEKTTQSALQPPEQRNEGLTSTLKTLLVFTALMITLPIGLYFSSKSYVFEFGLGMSNGDSYFYAAIVAVIIVHVVLALFVYVAVWNEGSR

>OpTTmem  
MERLEKTTLSVLQPPELRNEGLTSTLKTLLVFTALMITLPIGLYFSSKSYVFEFTLGLSNRDSYFYAAIVAVVAVHVVLALFVYVAVWNEGSR

|           |   |       |    |       |    |       |    |       |    |       |    |       |    |       |    |       |    |       |    |       |     |    |   |   |   |   |   |   |   |   |   |   |   |   |   |   |   |   |   |   |   |   |   |   |   |   |   |   |   |   |   |   |   |   |   |   |   |   |   |   |   |   |   |   |   |   |   |   |   |   |   |   |   |   |   |   |   |   |   |   |   |   |   |   |   |   |   |   |   |   |   |   |   |   |   |   |   |   |   |   |   |     |     |
|-----------|---|-------|----|-------|----|-------|----|-------|----|-------|----|-------|----|-------|----|-------|----|-------|----|-------|-----|----|---|---|---|---|---|---|---|---|---|---|---|---|---|---|---|---|---|---|---|---|---|---|---|---|---|---|---|---|---|---|---|---|---|---|---|---|---|---|---|---|---|---|---|---|---|---|---|---|---|---|---|---|---|---|---|---|---|---|---|---|---|---|---|---|---|---|---|---|---|---|---|---|---|---|---|---|---|---|---|-----|-----|
| HumanIn   | M | P     | R  | S     | H  | R     | P  | P     | P  | T     | A  | Q     | R  | A     | A  | E     | P  | K     | S  | E     | G   | V  | V | A | M | T | F | K | I | F | L | L | F | A | G | L | M | V | K | V | P | V | G | L | Y | F | S | C | K | L | L | L | F | Q | S | L | M | L | M | S | P | E | D | S | G | F | Y | A | T | I | V | A | V | V | G | L | H | V | V | L | A | I | F | V | F | I | V | W | K | E | G | L | P | Q | W | R | E | N | K | N | E | X   | 102 |
| MouseIn   | M | P     | R  | S     | H  | R     | Q  | P     | P  | P     | A  | P     | R  | A     | E  | P     | K  | S     | D  | G     | V   | L  | A | M | T | F | K | I | F | L | L | F | A | G | L | M | V | K | V | P | V | G | L | Y | F | S | C | K | L | L | L | F | Q | S | L | M | L | M | S | P | E | D | S | A | F | Y | A | T | I | V | S | V | V | G | L | H | V | V | L | A | I | F | V | F | I | V | W | K | E | G | L | P | Q | W | R | E | N | K | N | D | X | 102 |     |
| RatIn     | M | P     | C  | S     | H  | R     | Q  | P     | P  | P     | V  | P     | R  | A     | E  | P     | K  | S     | D  | G     | V   | L  | A | M | T | F | K | I | F | L | L | F | A | G | L | M | V | K | V | P | V | G | L | Y | F | S | C | K | L | L | L | F | Q | S | L | M | L | M | S | P | E | D | S | A | F | Y | A | T | I | V | S | V | V | G | L | H | V | V | L | A | T | F | V | F | I | V | W | E | E | G | L | P | Q | W | R | E | N | K | N | D | X | 102 |     |
| DogIn     | M | P     | R  | S     | H  | R     | P  | P     | P  | T     | A  | Q     | R  | P     | A  | E     | P  | K     | P  | E     | G   | S  | L | A | T | T | F | K | I | F | L | L | F | A | G | L | M | V | K | V | P | V | G | L | Y | F | S | C | K | L | L | L | F | Q | S | L | L | L | M | S | P | D | D | S | G | F | Y | A | T | I | V | A | V | V | G | L | H | V | V | L | A | V | F | V | F | I | V | W | K | E | G | M | P | D | W | Q | E | N | K | S | E | X   | 102 |
| CowIn     | M | P     | R  | S     | H  | R     | P  | P     | P  | T     | A  | Q     | R  | A     | E  | P     | K  | P     | E  | G     | S   | L  | A | T | T | F | K | I | F | L | L | F | A | G | L | M | V | K | V | P | V | G | L | Y | F | S | C | K | L | L | L | F | Q | S | L | L | L | M | S | P | D | D | S | G | F | Y | A | T | I | V | A | V | V | G | L | H | V | V | L | A | V | F | V | F | I | V | W | K | E | G | M | P | D | W | R | E | E | K | N | E | X | 102 |     |
| ElephIn   | M | P     | R  | S     | H  | R     | H  | P     | P  | A     | A  | P     | R  | T     | E  | E     | P  | K     | S  | D     | G   | V  | L | P | M | T | F | K | I | F | L | L | F | A | G | L | M | V | K | V | P | V | G | L | Y | F | S | C | K | L | L | L | F | Q | S | L | M | L | M | S | P | E | D | S | A | F | Y | A | T | I | V | A | V | V | G | L | H | V | E | L | A | F | F | F | I | I | V | W | K | E | G | L | P | H | W | R | E | N | K | N | E | X   | 102 |
| ArmIn     | M | P     | R  | S     | H  | R     | P  | P     | P  | V     | A  | Q     | R  | P     | A  | E     | P  | K     | S  | D     | G   | V  | L | A | M | T | F | K | I | F | L | L | F | A | G | L | M | V | K | V | P | V | G | L | Y | F | S | C | K | L | L | L | F | Q | S | L | M | L | M | S | P | E | D | S | A | F | Y | A | T | I | V | A | V | V | G | L | H | V | V | L | A | I | F | V | F | I | V | W | K | E | G | L | L | Q | W | R | E | N | K | N | D | X   | 102 |
| HumanTmem | M | E     | R  | P     | D  | K     | A  | A     | L  | N     | A  | L     | Q  | P     | P  | E     | F  | R     | N  | E     | S   | S  | L | A | S | T | L | K | T | L | L | F | F | T | A | L | M | I | T | V | P | I | G | L | Y | F | T | T | K | S | Y | I | F | E | G | A | L | G | M | S | N | R | D | S | Y | F | Y | A | A | I | V | A | V | V | A | V | H | V | V | L | A | L | F | V | Y | V | A | W | N | E | G | S | R | Q | W | R | E | G | K | Q | D | X   | 102 |
| MouseTmem | M | E     | R  | L     | D  | K     | A  | A     | L  | N     | A  | L     | Q  | P     | P  | E     | F  | R     | N  | E     | N   | S  | L | A | A | T | L | K | T | L | L | F | F | T | A | L | M | I | T | V | P | I | G | L | Y | F | T | T | K | A | Y | I | F | E | G | A | L | G | M | S | N | R | D | S | Y | F | Y | A | A | I | V | A | V | V | A | V | H | V | V | L | A | L | F | V | Y | V | A | W | N | E | G | S | R | Q | W | R | E | G | K | Q | D | X   | 102 |
| CowTmem   | M | E     | R  | L     | D  | K     | A  | A     | L  | N     | A  | L     | Q  | P     | S  | D     | F  | R     | N  | E     | S   | S  | L | A | S | T | L | K | T | L | L | F | F | T | A | L | M | I | T | V | P | I | G | L | Y | F | T | T | K | S | Y | V | F | E | G | A | F | G | M | S | N | R | D | S | Y | F | Y | A | A | I | V | A | V | V | A | V | H | V | V | L | A | L | F | V | Y | V | A | W | N | E | G | S | R | Q | W | R | E | G | K | Q | D | X   | 102 |
| DogTmem   | M | E     | R  | L     | D  | K     | A  | A     | L  | N     | A  | L     | Q  | P     | P  | D     | F  | R     | N  | E     | S   | S  | L | A | S | T | L | K | T | L | L | F | F | T | A | L | M | I | T | V | P | I | G | L | Y | F | T | T | K | S | Y | V | F | E | G | A | F | G | M | S | N | R | D | S | Y | F | Y | A | A | I | V | A | V | V | A | A | H | V | V | L | A | L | F | V | Y | V | A | W | N | E | G | S | R | Q | W | R | E | G | K | Q | D | X   | 102 |
| ElephTmem | M | E     | R  | L     | D  | K     | A  | A     | L  | N     | A  | L     | Q  | P     | P  | D     | F  | R     | S  | E     | S   | S  | L | A | S | T | L | K | T | L | L | F | F | T | A | L | M | I | T | V | P | I | G | L | Y | F | T | T | K | S | Y | V | F | E | G | A | L | G | M | S | R | D | S | Y | F | Y | A | A | I | V | A | V | V | A | V | H | V | V | L | A | L | F | L | Y | V | A | W | N | E | G | S | R | Q | W | R | E | G | K | Q | D | X | 102 |     |
| ArmTmem   | M | E     | R  | F     | D  | K     | A  | A     | L  | N     | A  | L     | Q  | P     | P  | E     | F  | R     | T  | E     | S   | S  | L | A | S | T | L | K | T | L | L | F | F | T | A | L | M | I | T | V | P | I | G | L | Y | F | T | T | K | S | Y | L | F | E | G | A | L | G | M | S | N | R | D | S | Y | F | Y | A | A | I | V | A | V | V | A | V | H | V | V | L | A | L | F | V | Y | V | A | W | N | E | G | S | R | Q | W | R | E | G | K | Q | D | X   | 102 |
| OpMTmem   | M | E     | R  | L     | E  | K     | T  | T     | Q  | S     | L  | Q     | P  | P     | E  | Q     | R  | N     | E  | G     | S   | L  | T | S | T | L | K | T | L | L | V | F | T | A | L | M | I | T | L | P | I | G | L | Y | F | S | S | K | S | Y | V | F | E | G | F | L | G | M | S | N | G | D | S | Y | F | Y | A | A | I | V | A | V | I | A | V | H | V | V | L | A | L | F | V | Y | V | A | W | N | E | G | S | R | Q | W | R | E | G | K | Q | D | X | 102 |     |
| OpTTmem   | M | E     | R  | L     | E  | K     | T  | T     | L  | S     | V  | L     | O  | P     | P  | E     | L  | R     | N  | E     | G   | S  | L | T | S | T | L | K | T | L | L | V | F | T | A | L | M | I | T | L | P | I | G | L | Y | F | S | S | K | S | Y | V | F | E | G | T | L | G | L | S | N | R | D | S | Y | F | Y | A | A | I | V | A | V | V | A | V | H | V | V | L | A | L | F | V | Y | V | A | W | N | E | G | S | R | Q | W | R | E | G | K | Q | D | X   | 102 |
| ruler     | 1 | ..... | 10 | ..... | 20 | ..... | 30 | ..... | 40 | ..... | 50 | ..... | 60 | ..... | 70 | ..... | 80 | ..... | 90 | ..... | 100 | .. |   |   |   |   |   |   |   |   |   |   |   |   |   |   |   |   |   |   |   |   |   |   |   |   |   |   |   |   |   |   |   |   |   |   |   |   |   |   |   |   |   |   |   |   |   |   |   |   |   |   |   |   |   |   |   |   |   |   |   |   |   |   |   |   |   |   |   |   |   |   |   |   |   |   |   |   |   |   |   |     |     |

Printed: Wednesday, September 16, 2009 11:43:38

---

```
>ElephantMcts1
MGKGRFDEKENVSNCIQLKTSVIKGIKNQLVEQFPGIEPWLNQIMPKKDPVKIVRCHEHI
EILTVNGELLFFRQREGPFYPTLRLLLHKYPF ILPHQQVDKGAIKFVLSGANIMCPGLTSP
GAKLYPAAVDTIVAIMAEGKQHALCVGVMKMSAEDIEKVNKGIGIENIHYLNDGLWHMKT
YKX
>GorillaMcts1
--KGRFDEKENVSNCIQLKTSVIKGIKNQLIEQFPGIEPWLNQIMPKKDPVKIVRCHEHI
EILTVNGELLFFRQREGPFYPTLRLLLHKYPF ILPHQQVDKGAIKFVLSGANIMCPGLTSP
GAKLYPAAVDTIVAIMAEGKQHALCVGVMKMSAEDIEKVNKGIGIENIHYLNDGLWHMKT
YKX
>HedgehogMcts1
MGKGRFDEKENVSNCIQLKTSVIKGIKNQLIEQFPGIEPWLNQIMPKKDPVKIVRCHEHI
EILTVNGELLFFRQREGPFYPTLRLLLHKYPF ILPHQQVDKGAIKFVLSGANIMCPGLTSP
GAKLYPAAVDTIVAIMAEGKQHALCVGVMKMSAEDIEKVNKGIGIENIHYLNDGLWHMKT
YKX
>PlatypusMcts1
-SFDRFDEKENVSNCIQLKTSVIKGIKNQLIDQFPGIEPWLNQIMPKKDPVKIVRCHEHI
EILTVNGELLFFRQREGTFYPTLRLLLHKYPF ILPHQQVDKGAIKFVLSGANIMCPGLTSP
GAKLYPAAADTVVAIMAEGKQHALCVGVMKMSADDIEKVNKGIGIENIHYLNDGLWHMKT
YKX
>ChickenMcts1
-MFKKFDEKENVSNCIQLKTSVIKGIKNQLIDQFVIEPWLNQIMPKKDPVKIVRCHEHI
EILTVNGELLFFRQREGIFYPYPTLRLLLHKYPF ILPHQQVDKGAIKFVLSGANIMCPGLTSP
GAKLYPAAVDTIVAIMAEGKQHALCVGVMKMSADDIEKVNKGIGIENIHYLNDGLWHMKT
YKX
>ChimpMcts1
MGKGRFDEKENVSNCIQLKTSVIKGIKNQLIEQFPGIEPWLNQIMPKKDPVKIVRCHEHI
EILTVNGELLFFRQREGPFYPTLRLLLHKYPF ILPHQQVDKGAIKFVLSGANIMCPGLTSP
GAKLYPAAVDTIVAIMAEGKQHALCVGVMKMSAEDIEKVNKGIGIENIHYLNDGLWHMKT
YKX
>CowMcts1
-MFKKFDEKENVSNCIQLKTSVIKGIKNQLIEQFPGIEPWLNQIMPKKDPVKIVRCHEHI
EILTVNGELLFFRQREGPFYPTLRLLLHKYPF ILPHQQVDKGAIKFVLSGANIMCPGLTSP
GAKLYPAAVDTIVAIMAEGKQHALCVGVMKMSAEDIEKVNKGIGIENIHYLNDGLWHMKT
YKX
>DogMcts1
MGKGRFDEKENVSNCIQLKTSVIKGIKNQLIEQFPGIEPWLNQIMPKKDPVKIVRCHEHI
EILTVNGELLFFRQREGPFYPTLRLLLHKYPF ILPHQQVDKGAIKFVLSGANIMCPGLTSP
GAKLYPAAVDTIVAIMAEGKQHALCVGVMKMSAEDIEKVNKGIGIENIHYLNDGLWHMKT
YKX
>GuineaMcts1
MGKGRFDEKENVSNCIQLKTSVIKGIKNQLIEQFPGIEPWLNQIMPKKDPVKIVRCHEHI
EILTVNGELLFFRQREGPFYPTLRLLLHKYPF ILPHQQVDKGAIKFVLSGANIMCPGLTSP
GAKLYPAAADTIVAIMAEGKQHALCVGVMKMSAEDIEKVNKGIGIENIHYLNDGLWHMKT
YKX
>HumanMcts1
-MFKKFDEKENVSNCIQLKTSVIKGIKNQLIEQFPGIEPWLNQIMPKKDPVKIVRCHEHI
EILTVNGELLFFRQREGPFYPTLRLLLHKYPF ILPHQQVDKGAIKFVLSGANIMCPGLTSP
GAKLYPAAVDTIVAIMAEGKQHALCVGVMKMSAEDIEKVNKGIGIENIHYLNDGLWHMKT
YKX
>MarmosetMcts1mRNA
-MFKKFDEKENVSNCIQLKTSVIKGIKNQLIEQFPGIEPWLNQIMPKKDPVKIVRCHEHI
EILTVNGELLFFRQREGPFYPTLRLLLHKYPF ILPHQQVDKGAIKFVLSGANIMCPGLTSP
GAKLYPAAVDTIVAIMAEGKQHALCVGVMKMSAEDIEKVNKGIGIENIHYLNDGLWHMKT
YKX
>MouseMcts1
-MFKKFDEKENVSNCIQLKTSVIKGIKNQLLEQFPGIEPWLNQIMPKKDPVKIVRCHEHI
EILTVNGELLFFRQREGPFYPTLRLLLHKYPF ILPHQQVDKGAIKFVLSGANIMCPGLTSP
GAKLYPAAVDTIVAIMAEGKQHALCVGVMKMSAEDIEKVNKGIGIENIHYLNDGLWHMKT
YKX
>OpossumMcts1
```

Printed: Wednesday, September 16, 2009 11:43:38

---

---

-MFKKFDEKESVINCIQLKNSVIKGIKNQLTSLFPEIKPWLNQIIPKKDLIKIVRCHEHI  
EILTVNGELLFFRQREGPFLPTLRLLLHKYPF ILPHQQVDKGAIKYVLSGANIMCPGLTSP  
GAKLSPAADTIVAVMAEGKQHALSVGIMKMSSEEIKKVNKGIGIENVHYLNDGLWHMKT  
YKX

&gt;RatMcts1

MGKGRFDEKENVSNCIQLKTSVIKGIKNQLLEQFPGIEPWLNQIMPKKDPVKIVRCHEHI  
EILTVNGELLFFRQREGPFYPTLRLLLHKYPF ILPHQQVDKGAIKFVLSGANIMCPGLTSP  
GAKLYPAAVDTIVAIMAEGKQHALCVGVMKMSAEDIEKVNKGIGIENIHYLNDGLWHMKT  
YKX

&gt;RhesusMcts1mRNA

MGKGRFDEKENVSNCIQLKTSVIKGIKNQLIEQFPGIEPWLNQIMPKKDPVKIVRCHEHI  
EILTVNGELLFFRQREGPFYPTLRLLLHKYPF ILPHQQVDKGAIKFVLSGANIMCPGLTSP  
GAKLYPAAVDTIVAIMAEGKQHALCVGVMKMSAEDIEKVNKGIGIENIHYLNDGLWHMKT  
YKX

&gt;ChimpMcts2

-MFKKFDEKESVSNCIQLKTSVIKGIKSQOLVEQFPGIEPWLNQIMPKKDPVKIVRCHEHT  
EILTVSGELLFFRQRKGPFCPTLRLLLHKYPF ILPHQQVDKGAIKFVLSGANIMCPGLTSP  
GAKLYPAAVDTIVAVTAEGKQHALCVGVMKMSAEDIEKVNKGIGIENIHYLNDGLWHMKT  
YKX

&gt;MarmosetMcts2

-MFKKFDEKESVSNCIQLKTSVIKGIKSQLEQFPGIEPWLNQIMPKKDPVKIVRCHEHT  
EILTVSGELLFFRQRKGPFCPTLRLLLHKYPF ILPHQQVDKGAIKFVLSGANIMCPGLTSP  
GAKLFPAAVDTIVAVTAEGKQHALCVGVMKMSAEDIEKVNKGIGIENIHYLNDGLWHMKT  
YKX

&gt;MouseMcts2

-MFKKFDEKESVSNCIQLKTSVIKGIKSQLTEQFPGIEPWLNQIMPKKDPVKIVRCHEHM  
EILTVNGELLFFRQRKGPFCPTLRLLLHKYPF ILPHQQVDKGAIKFVLSGANIMCPGLTSP  
GAKLYTAAVDTIVAVMAEGKEHALCVGVMKMAAADIEKINKGIGIENIHYLNDGLWHMKT  
YKX

&gt;OrangutanMcts2

-MFKKFDEKESVSNCIQLKTSVIKGIKSQOLVEQFPGIEPWLNQIMPKKDPVKIVRCHEHT  
EILTVSGELLFFRQRKGPFCPTLRLLLHKYPF ILPHQQVDKGAIKFVLSGANIMCPGLTSP  
GAKLYPAAVDTIVAVTAEGKQHALCVGVMKMSAEDIEKVNKGIGIENIHYLNDGLWHMKT  
YKX

&gt;RatMcts2

-MFKKFDEKESVSNCIQLKTSVIKGIKSQLTEQFPGIEPWLNQIMPKKDPVKIVRCHEHM  
EILTVNGELLFFRQRKGPFCPTLRLLLHKYPF ILPHQQVDKGAIKFVLSGANIMCPGLTSP  
GAKLYTAAVDTIVAVMAEGKEHALCVGVMKMAAADIEKINKGIGIENIHYLNDGLWHMKT  
YKX

&gt;newhumanMcts2

-MFKKFDEKESVSNCIQLKTSVIKGIKSQOLVEQFPGIEPWLNQIMPKKDPVKIVRCHEHT  
EILTVSGELLFFRQRKGPFCPTLRLLLHKYPF ILPHQQVDKGAIKFVLSGANIMCPGLTSP  
GAKLYPAAVDTIVAVTAEGKQHALCVGVMKMSAEDIEKVNKGIGIENIHYLNDGLWHMKT  
YKX



>P.troglodytesNap115  
MADSENQGAEPSQAAAA-----AEAAAAEEVMAEGGAQGGDCDSAAGDP-----  
-----DSAAGEMAEPPQTPAENAPKPKNDFIENLPNLVKR  
PIMALKKLQKRCDKIEAKFDKEFQALEKKYNDIYKPLLAKIQELT-----GEMEGCAWTL  
EGEEEE-----EEYEDDEEEGEDEEEEE-AAAAEAAA-----  
-----  
-----GAKHDDA  
HAEMPDDAKKX-----  
-----  
-----

>B.taurusNap115  
MADSONQGSAPESQAAAAAAAAADAAAAEEVMAEGGAQGGSDSASSDS-----  
-----DGVVGQMAEPPQTPAENAPKPRNDFIESLPNSVKC  
RVLALKKLQKRCDKIEAKFDKEFQALEKKYNDIYKPLLAKIQELT-----GEMEGCAWTL  
EGDEEDD-----DDDEYEDEEEGEEDEEEEEPAEEAAG-T-----  
-----  
-----AAKDEGP  
HSAVPDDAKKX-----  
-----  
-----

>C.l.familiarisNap115  
MADSENQGAEPSQA-----AAEAAEEVMAEGGAQGGSDSAA-----  
-----GPTAEPPQTPADNAPKPKNDFIESLPNSVKC  
RVLALKKLQKRCDKIEAKFDKEFQALEKKYNDIYKPLLAKIQELT-----GEMEGCAWTL  
EGEEDDD-----DEEYEDEEEGEEEEEEEEAAAAEAVEA-----  
-----  
-----AAKDEGP  
HSAVPDDAKK-----  
-----  
-----

>H.sapiensNap115  
MADSENQGAEPSQAAAA-----AEAAAAEEVMAEGGAQGGDCDSAAGDP-----  
-----DSAAGQMAEPPQTPAENAPKPKNDFIESLPNSVKC  
RVLALKKLQKRCDKIEAKFDKEFQALEKKYNDIYKPLLAKIQELT-----GEMEGCAWTL  
EGEEEE-----EEYEDDEEEGEDEEEEE-AAAAEAAA-----  
-----  
-----GAKHDDA  
HAEMPDDAKKX-----  
-----  
-----

>C.jacchusNap115  
MADSENQGAEPSQAAAA-----AEA-----  
-----AAGQMAEPPQTPAENAPKPKNDFIESLPNSVKC  
RVLALKKLQKRCDKIEAKFDKEFQALERKYNDIYKPLLAKIQELT-----GEMEGCAWTL  
EGEEE-----GGR-----  
-----  
-----GVRGX-----  
-----  
-----

>M.musculusNap115

MADPEKQGPAE-----SRAEDEVME--GAQGGE-DAATG-----  
 -----DSAAAPAAEFPQAPAENAPKPKKDFMESLPNSVKC  
 RVLALKKLQKRCDKIEAKFDKEFQALEKKYNDIYKPLLAKIQELT-----GEMEGCAWTL  
 EGEDDE-----DDEEEDDEEEEEEEEEAAAGATG-----  
 -----  
 -----

---GPNFAKKX-----  
 -----  
 -----

>P.pygmaeusNap115

MADSENQGAEPSQAAAA-----AEAAAAEVMAGGAQGGDCDSAAGDP-----  
 -----DSAAGEMAEFPQTPAENAPKPKNDFIESLPNSVKC  
 RVLALKKLQKRCDKIEAKFDKEFQALEKKYNDIYKPLLAKIQELT-----GEMEGCAWTL  
 EGEEEE-----EEYEDDEEEGEEEEEEEEAAEAAA-----  
 -----  
 -----

-----GAKHDDA  
 HAEMPDDAKKX-----  
 -----  
 -----

>R.novergicusNap115

MADPEKQGPAE-----SRAEDEVME--GAQGGE-DAATG-----  
 -----DSATAPAAEFPQAPAENAPKPKNDFIESLPNPVKC  
 RVLALKKLQKRCDKIEAKFDKEFQALEKKYNDIYKPLLAKIQELT-----GEMEGCAWTL  
 EGEDDE-----DDEEEDDEEEEEEE-AAAGATG-----  
 -----  
 -----

---GPDSAEKX-----  
 -----  
 -----

>M.mulattaNap115

MADSENQGAEPSQAAAA-----AEAAAAEVMAGGAQGGDCDSAAGDP-----  
 -----DSAAGQMAEFPQTPAENAPKPKNDFIESLPNSVKC  
 RVLALKKLQKRCDKIEAKFDKEFQALEKKYNDIYKPLLAKIQELT-----GEMEGCAWTL  
 EGEEEE-----EEYEDDEEEGEEEEEEED-AAEAAA-----  
 -----  
 -----

-----GAKHDDA  
 HAEMPDDAKKX-----  
 -----  
 -----

>H.sapiensNap113

MAEAD-FKMVSEPVAHGVAEEEMASSTSDSGEESDSSSSSSSTSDSSSSSSSTSGSS--G  
 SGSSSSSSSGS-----TSSRSRLYRKKRVPEPSRRARRA--PLGTNFVDRLPQAVRN  
 RVQALRNIQDECDKVDTLFLKAIHDLERKYAELNKPLYDRRFQIINAEYEPTEEECEWNS  
 EDEEFSSDEEVQDNTFSEMPPLIGE-EEENPKENPEVKAEKEVPKEIPEVKDEEKEVPK  
 EIPEVK-----  
 -----AEEKADSKDCMEATPEVKEDPKEVPQVKADDKEQPKATEAKARA  
 AVRETHKRVPEERLQDSVDLKRARKGPKREDPKGIPDYWLIVLKNVDKLGPMIQKYDEP  
 ILKFLSDVSLKFSKGPQVSYTFEFHFLPNPYFRNEVLVKTYIIKAKPDHNDPFFSWGWE  
 IEDCKGCKIDWRRGKDVTVTTTQSR--TATGEIEIQPRVVPNASFFNFFSPPEIPMIGK  
 ---LEPREDAILDEDFEIGQILHDNVILKSIYYTGEVN--GTYYQFGKHYGNKKYRXX--  
 -----  
 -----

>C.jacchusNap113

MAEAD-FKEVSEPVAQSVAAEEMASSASDSGEESSSSSSSSSTSSSSSSSSSSSSSS--S

SGSSSTSSGS-----GLYRKKRVPEPSRRARRA--PWRTDFVIKLPQAVRN  
RVQALRNIQDECDKVDLFLKAIHDLERKYAELNKPLYDRRFQIINAEYEPTEEECEWNS  
EDEEFSSDEEVQDDTLSEMPPLIGE-EEKPKENPEVKAAEKEVPKEIPEVKDEEKEVPK  
EIPEVKDEEKEVPKEIPEVKDEEKEVPKEIAEVMDEEKVIPKEIAEVMDEEKVIPKEIAE  
VMDEEKVVPKEIAEVKAAEKADSEDGMEAIPEVKEDPKEAPQAKAEDKEQPKATEAKPRA  
GVREAHKRVPEERLPERVSLKRARRGKPKREDPKGIPDYWLIVLKNVDKLGPMIQYDEP  
ILKFLSDVNLKFSKGPQVSYTFEFHFLPNPYFRNEVLVKTYIIKSKPDHHDPPFFSWGWE  
IEDCKGCKIDWRRGKDVTVKTIQSRT--TATG--EIQPRVVPNSSFFNFFSPPEIPMIGK  
---LEPQEDAILDEDFEIGQILHDNVILKSIYYTGEVNEYGSYYGVGKDYGNRKYRKX-

>M.musculusNap113

MAEAD-PKMVTEPGAHVAAEEAMASTACDSGDESNSSSSSTNSCSSSGSSSSSGSSSSSS  
SSSSSSSSSSSSSSSGSSGSSSSNGSHLNRKKRVPEPSRRAQRR--PSGKFLDKLPQAVRN  
RVQALRNIQNECDKVDLFLRAIHDLERKYAELNKPLYDKRFQIINAEYEPTEEECEWNS  
E-EEFSGDEEMQDDTPNEMPPLEGEESNEKAEVKEEGTHVPEEVPEAKVEEEEAPK  
ETPEVKTEEKDIPKEGAEKAEQESSKE-----  
-----IPEVKGEEKADSTDCIDIAPEEKEDVKEVTQANTENKDQP-TEEFTPRA  
PAREAQKRVPETRPEEGVNIKRARKGKPKKEDPKGIPDYWLTVLKNVDKLGPMIQKDEP  
ILKFLSDVSLKFSNPGQPIGYTFEFHFLPNPYFRNELLMKTYIIRSKPDHYDPPFAWGWE  
IEECKGCKIDWRRGKDVTVTTTTRSRP--GITGIEVQPRVVPNASFFNFFSPPEIPLIGK  
---LEPREDAILDEDFEIGQILHDNVILKSIYYFTGEIN--DPYYHDFRDYGNRKYKX-

>P.pygmaeusNap113

MAEAD-FKMVSEPVAGVAAEEEMASSTSDSGEESDSSSSSSTSGSSSSSSTSGSSSSSSG  
SGSSSSSSSGSGS-----TSSRSRLYRKKRVPEPSRRARRA--PLGTNFVDRLPQAVRN  
RVQALRNIQDECDKVDLFLKAIHDLERKYAELNKPLYDRRFQIINAEYEPTEEECEWNS  
EDEEFSSDEEVQDNTPEMPPLIGE-EEENPKENPEVKAAEKEVPKEIPEVKDEEKEVPK  
EIPQVK-----  
-----AEEKADSKDCMEATPEVNEDPKEAPQVKADDKEQPKATEAKARA  
AVREAHKRVPEERLQDSVDLKRARKGKPKREDPKGIPDYWLIVLKNVDKLGPMIQYDEP  
ILKFLSDVSLKFSKGPQVSYTFEFHFLPNPYFRNEVLVKTYIIKSKPDHNDPPFFSWGWE  
IEDCEGCKIDWRRGKDVTVTTTQSRT--TATGIEIQQPRVVPNASFFNFFSPPEIPMIGK  
---LEPREDAILDEDFEIGQILHDNVILKSVYYTGEVN--GTYQFGKHYGNKKYRKX-

>R.novergicusNap113

MAEAD-PKMVTEPGAHVAAEEAMASTACDSGDESNSSSSSTNSCSSSGSSSSSGSSSSSS  
SSSSSSSSSSSSSSSGSSGSSSSNGSHLNRKKRVPEPSRRAQRR--PSGKFLDKLPQAVRN  
RVQALRNIQNECDKVDLFLRAIHDLERKYAELNKPLYDKRFQIINAEYEPTEEECEWNS  
E-EEFSGDEEMQDDTPNEMPPLEGEESNEKAEVKEEGTHVPEEVPEAKVEEEEAPK  
ETPEVKTEEKDIPKEGAEKAEQESSKE-----  
-----IPEVKGEEKADSTDCIDIAPEEKEDVKEVTQANTENKDQP-TEEFTPRA  
PAREAQKRVPETRPEEGVNIKRARKGKPKKEDPKGIPDYWLTVLKNVDKLGPMIQKDEP  
ILKFLSDVSLKFSNPGQPIGYTFEFHFLPNPYFRNELLMKTYIIRSKPDHYDPPFAWGWE  
IEECKGCKIDWRRGKDVTVTTTTRSRP--GITGIEVQPRVVPNASFFNFFSPPEIPLIGK  
---LEPREDAILDEDFEIGQILHDNVILKSIYYFTGEIN--DPYYHDFRDYGNRKYKX-

>P.troglodytesNap113

MAEAD-FKMVSEPVARGVAAEEEMASSTSDSGEESDSSSSSSTSDSSSSSSTSGSSS--G  
SGSSSSSSSGS-----TSSRSRLYRKKRVPEPSGRARRA--PLGTNFVDRLPQAVRN  
RVQALRNIQDECDKVDLFLKAIHDLERKYAELNKPLYDRRFQIINAEYEPTEEECEWNS  
EDEEFSSDEEVQDNTPEMPPLIGE-EEENPKENPEVKAAEKEVPKEIPEVKDEEKEVPK  
EIPEVK-----  
-----AEEKADSKDCMEATPEVKEDPKEVPQVKADDKEQPKATEAKARA  
AVREAHKRVPEERLQDSVDLKRARKGKPKREDPKGIPDYWLIVLKNVDKLGPMIQYDEP  
ILKFLSDVSLKFSKGPQVSYTFEFHFLPNPYFRNEVLVKTYIIKSKPDHNDPPFFSWGWE  
IEDCKGCKIDWRRGKDVTVTTTQSRT--TATGIEIQQPRVVPNASFFNFFSPPEIPMIGK  
---LEPREDAILDEDFEIGQILHDNVILKSIYYTGEVN--GTYQFGKHYGNKKYRKX-

>C.l.familiarisNap113

MAEED-LNMVSEPAARVTEEKMASSSSSDSGEESDSSSSSSTSCSSSS-----G  
SGRS-----RLYRKKRVSGPSRGARGA--PLGKSFVDRLPQAVRN



RVQALRNIQDECDKVDILFLKAIHDLERKYAELNKPLYDRRFQIINAEYEPTEEEYEWNS  
 EDEVFSSDEEVQEDSPIEMPALESEQEDDNPKEKPQVKAENEVPKEIPEAKTEEN----

-----AESKDFLGIKPEVKKEPEVVPQONAEDQKQPKAAEAKAKA  
 AVIEAPKRRISEVRPKERVNLKRARKGPKKEDPKGIPDYWLTVLKNVDKLGPMIQYDAP  
 ILKFLSDISLKFSKPGQPISYTFEFYFLPNPYFRNEMLTKTYIIKSKPDHNDPFFSWGWE  
 IQDCKGCKIDWRRGKDVTVTTTQSRT--TASGEIEIQPRVVANASFFNFFSPPEIPKIGK  
 ---LEPREDAILDEDFEIGQILHDNVILKSIYYYYTGEVK--GTYYDD--GKDYGNRKYRXX-

>P.troglodytesNap112

MAESENHKELESSQEEAGNQIMVEGLGEHLERGEDAAAGLGDDGKCGEEAAAGLGEEGE  
 NGEDTAAGSG-----EDGKKGDDTDEDSEADRPKGLIGYVLDTDFVESLPVKVKY  
 RVLALKKLQTRAAANLESKFLREFHDIERKFAEMYQPLLEKRRQIINAIYEPTEEECEYKS  
 DSEDCDDEEMCH---EEMYGNEEGMVHEYVDEDDGYEDYYDYAVEEEEEEE-----

-----EEEE--DIEATGEENKEEEDPKGIPDFWLTVLKNVDTLTPLIKKYDEP  
 ILKLLTDIKVKLSDPGEPLSFTLEFHFKNPNEYFKNELLTkTYVLKSKLAYDHPHYRGTA  
 IEYSTGCEIDWNEGKNVTLKTIKKKQKHRWGTIRTVTEDFPKDSFFNFFSPHGITSNGR  
 ---DGND-----DFLLGHNLRTYIIPRSVLFSSGDALE--SQQEGVVREVNDAIYDKII  
 YDNWMAAIEEVKACCKNLEALVEDIDRX

>C.l.familiarisNap112

MAESADHKKLLEFSQEEADNKVIMEGPGEQPEQSEDVAAGPGDDKERGEEAAVGPKEGG  
 KGEDAAAGSG-----EGGVKDEDIDEDSD--RPKGLIGYLLDITDFVESLPLKVKY  
 RVLALKKLQTRVANLESKFMREFHGIERKFAEMYQPLLEKRRQIINAIYEPTEKECEYKS  
 DSEYDDEEMCH---EEMYGNEEGLVHEYMDEDDGYEGDYDYAVEEDDGD-----

-----DDDDDNDDIEATGKENKEEQDPKGIPDFWLTVLKNVDTLTPLIKKYDEP  
 ILKLLTDIKVKLSDPGEPLSFTLEFHFKNPNEYFKNELLTkTYVLKSRLAYDHPHYRGTA  
 IEYCTGCEIDWNEGKNVTLKTIKKKQKHRWGTIRTVTEDFPKDSFFNFFTPQGISSNGK  
 ---DGND-----DFLLGHNLRTYIIPRSVLFSSGDALE--SQQEGVVREVNDAIYDKII  
 YDNWMAAIEEVKACCKNLETIVEDIDRX

>E.caballusNap112

MAESADYKELLESSQEEAGNKVMMEGPREQPE-----RGEAAAGPGEEGE  
 RGEDAAAGSG-----EGGEKGEDTDEDSDPDRPKGLTGYYLLDITDFVESLPVKVKY  
 RVLALKKLQTRVANLESKFLREFHDIERKFAELYQPLLEKRRQIINAIYEPTEKEECAYKS  
 DSEYDDEEMCH---EEMYGNEESLVHEYMDEGDGYEEDYYDYDVEEEDDE-----

-----DDDDDDDDIEATREENKEE--DPKGIPDFWLTVLKNVDTLTPLIKKYDEP  
 ILKLLTDIKVKLSDPGEPLSFTLEFHFKNPNEYFKNELLTkTYVLKSRLAYDHPHYRGTA  
 IEYCTGCEIDWNEGKNVTLKTIKKKQKHRWGTIRTVTEDFPKDSFFNFFTPHGISSNGK  
 ---DGND-----DFLLGHNLRTYIIPRSVLFSSGDALE--SQQEGVVREVNDAIYDKII  
 YDNWMAAIEEVKACCKNLETIVEDIDRX

>H.sapiensNap112

MAESENKELSESSQEEAGNQIMVEGLGEHLERGEDAAAGLGDDGKCGEEAAAGLGEEGE  
 NGEDTAAGSG-----EDGKKGDDTDEDSEADRPKGLIGYVLDTDFVESLPVKVKY  
 RVLALKKLQTRAAANLESKFLREFHDIERKFAEMYQPLLEKRRQIINAIYEPTEEECEYKS  
 DSEDCDDEEMCH---EEMYGNEEGMVHEYVDEDDGYEDYYDYAVEEEEEEE-----

-----EEDD--DIEATGEENKEEEDPKGIPDFWLTVLKNVDTLTPLIKKYDEP  
 ILKLLTDIKVKLSDPGEPLSFTLEFHFKNPNEYFKNELLTkTYVLKSKLAYDHPHYRGTA  
 IEYSTGCEIDWNEGKNVTLKTIKKKQKHRWGTIRTVTEDFPKDSFFNFFSPHGITSNGR  
 ---DGND-----DFLLGHNLRTYIIPRSVLFSSGDALE--SQQEGVVREVNDAIYDKII  
 YDNWMAAIEEVKACCKNLEALVEDIDRX

>C.jacchusNap112

MAESADHKELESSQEEAGNQIMMEGPGEQPERGEDAAAGLGDDGKCGDEAAAGLGEEGE  
 KGEDTAAGSG-----EDGKKGDDTDEDLDPDRPKGLIGYVLDITDFVESLPVKVKY  
 RVLALKKLQTRAAANLESKFLREFHDIERKFAEMYQPLLEKRRQIINAIYEPTEEECEYKS

```

DSEDYDDEEMYD-----EEMYGNEEGMVHEYVDEDDGYEDYDYDYAVEEEEEEDD-----
-----
-----
-----DDDDDDIEATGEENKEEEDPKGIPDFWLTVLKNVDALTPLIKKYDEP
ILKLLTDIKVKLSDPGEPLSFTLEFHFKPNEYFKNELLTkTYVLKSKLAYDHPYRGTA
IEYSTGCEIDWNEGKNVTLKTIKKRQKHWGTIRTVTEDFPKDSFFNFFSPHGFTSNGR
----DGND-----DfLLGHNLRTYIIPRSVLFfSGDALE-SQqEGVVREVNDEIYDKII
YDNWMAAIEEVKACCKNLEALVEDIDRX
>M.musculusNap112
MAESVDHKELSESNOEELGSQVMAEGPGESQDRSEGVSIEPGDGGQHGEETVAAGVGEEG
KGEEAAAGSG-----EDAGKCGGTDEDSDSDRPKGLIGYLLDfVfESLPVKVKC
RVLALKKLQTRAHLESKFLREFHDIERKFAEMYQPLLEKRRQIINAVYEPTEEECEYKS
DCEDYFEEEMDEE---EETNGNEDGMVHEYVDEDDGYEDCYDYDDEEEEEEE-----
-----
-----
-----EDD-SAGATGGEEVNEEDPKGIPDFWLTVLKNVEALTPMIKKYDEP
ILKLLTDIKVKLSDPGEPLSFTLEFHFKPNEYFKNELLTkTYVLKSKLACYDHPYRGTA
IEYATGCDIDWNEGKNVTLRTIKKKQRHRVWGTVRTVTEDFPKDSFFNFFSPHGfSLNGG
----DEND-----DfLLGHNLRTYIIPRSVLFfSGDALE-SQqEGVVREVNDEIYDKII
YDDWMAAIEEVKACCKNLEALVEDIDRX
>R.novergicusNap112
MAESAEHKELSDSNQEEELGSQVMAEGPGGSQDCSEGVSTEPGDGGQQGEETVAAGVEEEG
KGEEAAAGSG-----EDAGKRGAAEDSDSDRPKGLIGYLLDfVfESLPVKVKY
RVLALKKLQTRAHLESKFLREFHDIERKFAEMYQPLLEKRRQIINAVYEPTEEECEYKS
DCEDYFEEEMDEE---EETNGNEEGMVHEYVDEDDGYEDCYDYDDEEEEEEE-----
-----
-----
-----EEDESAGATGGEA VNEEDPKGIPDFWLTVLKNVEALTPMIKKYDEP
ILKLLTDIKVKLSDPGEPLSFTLEFHFKPNEYFKNELLTkTYVLKSKLACYDHPYRGTA
IEYATGCHIEWNEGKNVTLRTIKKKQRHRVWGTVRTVTEDFPKDSFFNFFSPHGfSLNGG
----DEND-----DfLLGHNLRTYIIPRSVLFfSGDALE-SQqEGVVREVNDEIYDKII
YDDWMAAIEEVKACCKNLEALVEDIDRX
>M.mulattaNap112
MAESANHKELSESSQqEAGNqIMVEGPGEHPERGEDAAAGLGDDGKCGEEAAAGLGEEGE
NGEDTAAGSG-----EDGKKGEDTDKSDPDRPKGLIGYVLDfVfESLPVKVKY
RVLALKKLQTRAANLESKFLREFHDIERKFAEMYQPLLEKRRQIINAIYEPTEEECEYKS
DSEDYDDEEMCD---EEMYGNEEGMVHEYVDEDDGYEDYDYDYAVEEEEEEE-----
-----
-----
-----EDEDEDDIEATGEENKEEEDPKGIPDFWLTVLKNVDLTPLIKKYDEP
ILKLLTDIKVKFSDPGEPLSFTLEFHFKPNEYFKNELLTkTYVLKSKLAYDHPYRGTA
IEYSTGCEIDWNEGKNVTLKTIKKKQKHWGTIRTVTEDFPKDSFFNFFSPHGfTSNGR
----DGND-----DfLLGHNLRTYIIPRSVLFfSGDALE-SQqEGVVREVNDAIYDKII
YDNWMAAIEEVKACCKNLEALVEDIDRX
>P.troglodytesNap111
MADID-NKEQSELdQDLDDVEEVVEE---EETGEETKlKARQLTVQMMQ-----
-----
-----NPQILAALQERLDGLV---ETPTGYIESLPRVVKR
RVNALKNLQVKAQIEAKFYEEVHDLERKYAVLYQPLfDKRFEIINAIYEPTEEECEWKP
D-----EEDEISEELKEKAKIEDEKKDEEKE-----
-----
-----
-----DPKGIPEFWLTfVfKNVDLLSDMVQEHDEP
ILKHLKDIKVKFSDAGQPMsfVLEFHFEPNEYfTNEVLTkTYRMRSEPDSDPFSFDGPE
IMGCTGCQIDWKKGNVTLKTIKKKQKHWGTVRTVTKTVSNDsfNFFAPPEVPESGD
---LDDDAEAILAADFEIGHfLRERIIPRSVLYfTGEAIEDDDD-DYDEEGEEADEEGEE
EGDEENDPDYDPKKDQNPACCKQqX---
>H.sapiensNap111
MADID-NKEQSELdQDLDDVEEVVEE---EETGEETKlKARQLTVQMMQ-----
-----
-----NPQILAALQERLDGLV---ETPTGYIESLPRVVKR
RVNALKNLQVKAQIEAKFYEEVHDLERKYAVLYQPLfDKRFEIINAIYEPTEEECEWKP
D-----EEDEISEELKEKAKIEDEKKDEEKE-----

```

-----  
 -----  
 -----DPKGIPEFWLTVFKNVDLLSDMVQEHDEP  
 ILKHLKDIKVKFSDAGQPMFVLEFHFEPNEYFTNEVLTKTYRMRSEPDDSDPFSFDGPE  
 IMGCTGCQIDWKKGKNVTLKTIKKKQKHKGRGTVRTVTKTVSNDSEFFNFAPPEVPESGD  
 ---LDDDAEAILAADFEIGHFLRERIIPRSVLYFTGEAIEDDDD-DYDEEGEEADEEGEE  
 EGDEENDPDYDPKKDQNPACCKQX---

>P.troglytesNap114

MADHS-FSDG---VPSDSVEAAKN--ASN-----TEKLTQVMQ-----  
 -----NPRVLAALQERLDNVP--HTPSSYIETLPKAVKR  
 RINALKQLQVRCAHIEAKFYEEVHDLERKYAALYQPLFDKRREFITGDVEPTDAESEWHS  
 ENE-----EEKLAGDMKNKVVVTEKEAATAEEP-----  
 -----

-----NPKGIPEFWFTIFRNVDMLSELVQYDEP  
 ILKHLQDIKVKFSDPGQPMFVLEFHFEPNDYFTNSVLTKTYKMKSEPKADPFSFEGPE  
 IVDCDGTIDWKKGKNVTVKTIKKKQKHKGRGTVRTITKQVPNESFFNFNPLKGNSSGD  
 GESLDEDESEFTLASDFEIGHFFRERIVPRAVLYFTGEAIEDDDNFEEGEEGEEEELEGDE  
 EGEDEDDAEINPKV-----

>M.domesticusNap114

MELFRRCFSRFLXNCXSXQRKTYRPGDAESPSASSSPGAAX-----  
 -----ECVPHAFELHXNLQSGQETHXCFETAAGEVCTH  
 RSQVLRGSAXFGAKIRSPPLASLX-XETGFCHWCXYRRCRIRMAQX--EXGGGETGWRS  
 EKQSGDS-----REGSSCRRAKSQRDSRILVYNLXKRGYAER-----  
 -----

-----ISAGVXXA  
 DFETPAGYQSQVLXPWAAHVLLVRVPLXAQRLLYQFCPDXLQDEIRARHHRPLLLRRPG  
 NSRLXRVHYRVEEGQERHRENNOEKAETXGPWHREDSHXASPQRFLFXLLXPHQSIWGR  
 VAGXRFRIYISFRLXNWTLLPXEDSSTCRPLFYWRSHRGXXXFXRRRGRGRRGKKWQRP  
 FPGRGPQSRPRERVRPACRVQAA-----

>H.sapiensNap114

MADHS-FSDG---VPSDSVEAAKN--ASN-----TEKLTQVMQ-----  
 -----NPRVLAALQERLDNVP--HTPSSYIETLPKAVKR  
 RINALKQLQVRCAHIEAKFYEEVHDLERKYAALYQPLFDKRREFITGDVEPTDAESEWHS  
 ENE-----EEKLAGDMKSKVVVTEKAAATAEEP-----  
 -----

-----DPKGIPEFWFTIFRNVDMLSELVQYDEP  
 ILKHLQDIKVKFSDPGQPMFVLEFHFEPNDYFTNSVLTKTYKMKSEPKADPFSFEGPE  
 IVDCDGTIDWKKGKNVTVKTIKKKQKHKGRGTVRTITKQVPNESFFNFNPLK--ASGD  
 GESLDEDESEFTLASDFEIGHFFRERIVPRAVLYFTGEAIEDDDNFEEGEEGEEEELEGDE  
 EGEDEDDAEINPKV-----



>ChimpU2af1-rs2  
 -----MTFPEKPSHKKYRAALKKEKRKKRRQELARLRDGLSGLSQKEEEDTFIEEQ  
 QLEEEKLLERERQRLHEEWLLREQKAQEEFRKKEKEEAARKRQEEQERKLKEQWEEQQR  
 KEREEREEQKQOEKKEKEEALQKMLDQAENELENGTTWQNPPEPPVDFRVMEKDRANCPFYS  
 KTGACRFGRDCSRKHNFPSTSSPTLLIKSMFTTFGMEQCRDDYDPDASLEYSEEETYYQQF  
 LDFYEDVLPPEFKNVGKVIQFKVSCNLEPHLRGNVYVQYQSEEECQAALSLFNWRWYAGRQ  
 LQCEFCPVTRWKMAICGLFEIQQCPRGKHCNLFHVFVRNPNEFWANRDIYLSPDRTGSS  
 FGKNSERRERMGHDDYYSRLRGR--NPSPDHSYKRNSESERKR--SSHRGKK--SHKRTSK  
 SRERHNSRSRGRNRDRS-----RDRSRG-----RGSRSRSR----RSRRSRS  
 QSSRSRSRGRRRSGNRDRTVQSPKSKX-----

>DogU2af1-rs2  
 ----MAAPEKMMFPEKPSHKKYRAALKKAKRKKRRQELARLRDGLLQKEEE-DAFIEEQ  
 RLEEEKLLERERQRLHEEWLLREQKAQEEFRKKEKEEAARKRQEEQERKLKEEWEEQQR  
 REREEREEQKLOEKRERE-----LENGATWQNPPEPIDLRIMEKDRANCPFYS  
 KTGACRFGRDCSRKHNFPSSSPTLLIKSMFTTFGMEQCRDDYDPDASLEYSEEETYYQQF  
 LDFYDDVLPPEFKNVGKVIQFKVSCNLEPHLRGNVYVQYQSEEECQAALSLFNWRWYAGRQ  
 LQCEFCPVTRWKMAICGLFEIHQCPRGKHCNLFHVFVRNPNEFWANRDIYLSPDRTGSS  
 FGKGSERRERTGHHDYYSRPRRR--SPSPVHSYKRNSEAEKRRSSHRGKK--SHKHLR  
 SRDGPSSRSRGRK-----RGSRSR-----RG-----SRS  
 QSSRSRSRGRRRSGSRDX-----

>HumanU2af1-rs2  
 ----MAAPEKMTFPEKPSHKKYRAALKKEKRKKRRQELARLRDGLSGLSQKEEEDTFIEEQ  
 QLEEEKLLERERQRLHEEWLLREQKAQEEFRKKEKEEAARKRQEEQERKLKEQWEEQQR  
 KEREEREEQKQOEKKEKEEALQKMLDQAENELENGTTWQNPPEPPVDFRVMEKDRANCPFYS  
 KTGACRFGRDCSRKHNFPSTSSPTLLIKSMFTTFGMEQCRDDYDPDASLEYSEEETYYQQF  
 LDFYEDVLPPEFKNVGKVIQFKVSCNLEPHLRGNVYVQYQSEEECQAALSLFNWRWYAGRQ  
 LQCEFCPVTRWKMAICGLFEIQQCPRGKHCNLFHVFVRNPNEFWANRDIYLSPDRTGSS  
 FGKNSERRERMGHDDYYSRLRGR--NPSPDHSYKRNSESERKS--SRHRGKK--SHKRTSK  
 SRERHNSRSRGRNRDRS-----RDRSRG-----RGSRSRSRSR--RSRRSRS  
 QSSRSRSRGRRRSGNRDRTVQSPKSKX-----

>MarmosetU2af1-rs2  
 ----MAAPEKMTFPEKPSHKKYRAALKKEKRKKRRQELARLRDGLSGLSQKEEEDTFIEEQ  
 QLEEEKLLERERQRLHEEWLLREQKAQEEFRKKEKEEAARKRQEEQERKLKEQWEEQQR  
 KEREEREEQKQOEKREKEEAVQKMLDRAENELENGTTWQNPPEPPVDFRVMEKDRANCPFYS  
 KTGACRFGRDCSRKHNFPSTSSPTLLIKSMFTTFGMEQCRDDYDPDASLEYSEEETYYQQF  
 LDFYEDVLPPEFKNVGKVIQFKVSCNLEPHLRGNVYVQYQSEEECQAALSLFNWRWYAGRQ  
 LQCEFCPVTRWKMAICGLFEIQQCPRGKHCNLFHVFVRNPNEFWANRDIYLSPDRTGSS  
 FGKNSERRERMGHHDYYSRLRGR--NPSPDHSYKRNSESERKR--SSHRGKK--SHKRTSK  
 SRERHSSRSRGRN-----RDRSRG-----RGSRSQSR----RSRRSRS  
 QSSRSRSRGRRRSGNKDRTVQSPKSKX-----

>MouseU2af1-rs2  
 METAGATADATAGPQKLSRKKYLALRKKERRRRRQALARLREAELAQKEEEDPLAEEK  
 RLEEEERLLEERERQRLHEEWLLREKAQEEFRAKKKKEEARKRKEELERKLKAWEWEEQQR  
 KEREEREEQKQOEKREEREEAVQKMLDQAENELENGTTWQNPPEPPMDIRVLEKDRANCPFYS  
 KTGACRFGRDCSRKHNFPSTSSPTLLIKGMFTTFGMEQCRDDYDPDSSLEFSEEEIYQQF  
 LDFYEDVLPPEFKSVGKVIQFKVSCNLEPHLRGNVYVQYQSEEDCQAASFVFNWRWYAGRQ  
 LQCEFCPVTRWKMAICGLFEVQQCPRGKHCNLFHVFVRNPNEYRDANRDLYPSPDWTSSS  
 FGKNSERRERASHYDEYYSR--YKRNSESERKR--SSHRGKK--SHRYGMK  
 SRERRSSPSRRK--DHSPGPWSQSRSHRSRSRSRSRSRSRTRSRSRGRGR--SRSRS  
 RSRSRGRSRGRGSRGRGRGRGRNQRSWSQSRSSSSSSRSRSGRR-----S  
 GSRDKTTQSPKSKX-----

>OpposumU2af1-rs2  
 -----MKVDDLPEKDEEEESIV-E  
 LEEEEKQLEAERQKLHEEWLLREQKAQEEFKLKEKEEAARKRQEEERKIKEEWEEQQR  
 KEKQEEERQKQOEKRDREEAVQKMLDQAESQLENGVTWHNPEPPVDLRATEKDQANCPFYI  
 KTGACRFGRDCSRKHNFPSTSSPTLLIRSMFTTFGMEQCRDDYDTPDASLEYSEEETYYQQF  
 LDFYEDVLPPEFKNVGKVIQFKVSCNLEPHLRGNVYVQYQSEEECQAALSLFNWRWYAGRQ

LQCEFPVTRWKMAICGLFGRQKCPRGKHCNLFHVFRNPNEFWEANRDIHMSPDWANTS
FGKSSERRDRTSYHEEYYSRSTRRRR-SPSPDHSYKRNAGESERKKSNNHRSKKKSHKHSSK
SHERRRSRGRK-----RDRSR-----SRSQSR-----RSQS
KSASRSRDRKRSTSRDRNTX-----

>RatU2af1-rs2

-----MVAG-----SRKKYMALRKKKEKRKKRRQELARLRDAELSQKEEEEDPLGEEK
RLEEERLLEAERQRLHEEWLLREEKAQEERAKRKEEAARKRKEELERKLLAEWEEQQR
KEREEREEQKQOQEKREER-----LENGGTWQNPPEPTDIRVLEKDRANCPFYS
KTGACRFGRDCSRKHNFPTSSPTLLIKSMFTTFGMEQCRDDYDPDSSLEYSEEETYQQF
LDFYYDVLPEFKSVGKVIQFKVSCNLEPHLRGNVYVQYQSEEDCQAAFVFNNGRUYAGRQ
LQCEFCPVTRWKMAICGLFEVQOCPRGKHCNLFHVFRNPNEYREANRDIYLSPDWTSSS
FAKSSERRERASHYDEYYGRSRRRR-SPSPGLSYKRNAGESDRKSSSNHRVKK-SHKHGMK
NRERHSSRSRRRKRDRHSLGPPWSQSRRSRHSRSHSQRSSSRSSRSCGRGRGWSHSRS
HSRSRKRSRNRSRSRNRNRNRNRKRNSRWSHSHSHSRSSSRSPGRRRSANMDMG
GSDHLQCEMPQEVISKGGQLCQSNFFKNTTWGFSFLWRENVRLWX

>RhesusU2af1-rs2

-----MTFPEKPSHKKYRAALKKEKRKKRRQELARLRDSGLSQKEEEEDTFIEEQ
QL-EEKLLERERQRLHEEWLLREOQAQEERIKKEKEEAARKRQEEQERKLKEQWEEQQR
KEREEREEQKROEKKEKEEALQKMLDQAENELENGTTWQNPPEPVDFRMEKDRANCPFYS
KTGACRFGRDCSRKHNFPTSSPTLLIKSMFTTFGMEQCRDDYDPDASLEYSEEETYQQF
LDFYEDVLPEFKNVGKVIQFKVSCNLEPHLRGNVYVQYQSEEECQAALSLFNGRUYAGRQ
LQCEFCPVTRWKMAICGLFEIQOCPRGKHCNLFHVFRNPNEFWEANRDIYLSPDRTGSS
FGKNSERRERMGHDDYYSRLRGR-NPSPDHSYKRNAGESERKR-SSHRGKK-SHKRTSK
SRERHNSRGRGNKDRS-----RDRSR-----RGRSRSR-----RSRRSRS
QSSSRSRGRRRSGNKDRTVQSPKSKX-----

>platypusU2af1-rs2

----MAAPAARDLAGKLSHRQYRAALKKEKRKKRRQELARLRDSGFAEKDEENSVAED-E
ELEEEKKLEAERQKLHEEWLLREOQAQEERFLKKEKEEAARKRQEEERRIKEEWEEQQR
KEREEREEQKLOKQRDREAVQKMLDQAESQLENGVTWHNPEPPADVRITEKDRANCPFYI
KTGACRFGRDCSRKHNYPTLSPTLLIRSMFITFGMEQCRDDYDTPDASLEYSEEETYQQF
LDFYEDVLPEFKNVGKVIQFKVSCNLEPHLRGNVYVQYQSEEECQEAFLFNGRUYAGRQ
LQCEFCPVTRWKMAICGLFERQKCPRGKHCNLFHVFRNPNEFWEANRDIHMSPDRTSQS
FGRSSERRDRPSHYEDYHGRSRRRR-SPSPDYSYKRNAGESERKKRSSHRSK-YHKSSSR
SSDKRSSHSRGRK-----RDRSR-----SRSR-----RSQS
RSPSRSRGRRRSASRERNPQSPKSKX-----

>mouseU2af1-rs1

----MASRQTAIPEKLSRKQYKAAMKKEKRKKRRQKMARLRALEAPPE-EDDDVSAN--
EELAERLLEIERQRLHEEWLLREKAQEERIKKKKEEAARKQKEEQERQIKAWEWEQQR
KQREEREEQKLOEKREEREEAVQKMLDQA----ENERIWQNPPEPKDLR-LEKYRPSCPFYN
KTGACRFGNRCSRKHDFPTSSPTLLVKSMTTFGMEQCRDDYDSANLEYSEEETYQQF
LDFYHDVLPEFKNVGKVIQFKVSCNLEPHLRGNVYVQYQSEEECQAALSLFNGRUYAGRQ
LQCEFCPVTRWKVAICGLFEMQKCPKKGKHCNLFHVFRNPNEFRANRDIYMSPPAWTGS
SGKNSDRRERKDHHEEYYSKRSYH--SGSYHSSKRNRESERKS--PHRWKK-SHKQTTK
SHERHSSR-RGRE-----E
DSSPGPQSQSHRTX-----

>RatU2af1-rs1

----MASQQTAFPEKLSRKQYKAAMKKEKRKKRRQKMARLRALEAPPEVEEEDVSAN--
EELAERLLEIERQKLHEEWLLREKAQEERIKKKKEEAARKQKEEQERQIKAWEWEQQR
KQREEREEQKLOEKREEREEAVQKMLDQA----ENEGTWQNPPEPKDLR-LEKYRPSCPFYN
KTGACRFGNRCSRKHDFPTSSPTLLVKSMTTFGMEQCRDDYDSANLEYSEEETYQQF
LDFYHDVLPEFKNVGKVIQFKVSCNLEPHLRGNVYVQYQSEEECQAALSLFNGRUYAGRQ
LQCEFCPVTRWKVAICGLFEMQKCPKKGKHCNLFHVFRNPNEFRDANRDIYL-PPASTGS
SGKNSDRGDRKDHREESYSKRSYH--SGSYHSSKRSRESERKS--PHRWKK-SHKQATK
SHERHSSR-RGRE-----E
GSSPGPQSQSHRTX-----
